# Supplementary material
Source: PubMed Central journal article supplement (PMC10600328)
Supplement: NIHMS1885209-supplement-fS3.pdf [file NIHMS1885209-supplement-fS3.pdf]

**A**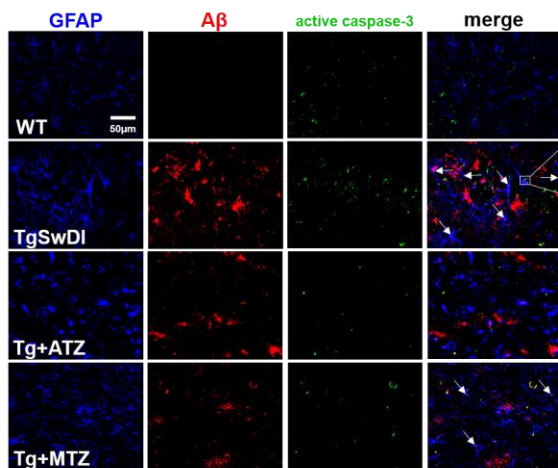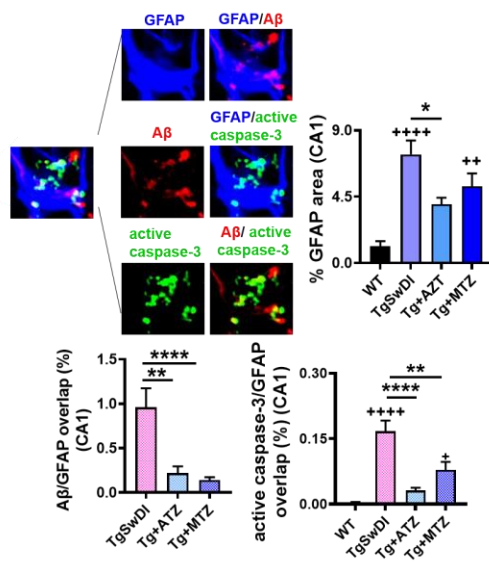**B**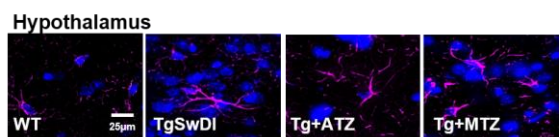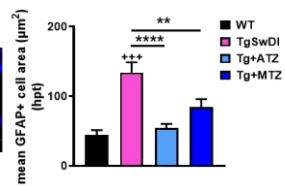

**Supplementary Figure 3: CAIs hamper A $\beta$  deposition and caspase-3 activation in astrocytes, rescuing A $\beta$ -initiated astrogliosis in CA1 area.** **A)** Representative immunofluorescence images of CA1 hippocampal area in 16-month-old mice illustrate significant increase of astrocytic marker (GFAP, blue) in TgSwDI animals, compared to WT mice, attenuated by 8-month-CAI-diet. Original magnification, 60x. Scale bar, 50 $\mu$ m. On the right, astrogliosis is plotted as %GFAP area per acquisition field. WT, TgSwDI and MTZ: N=5, ATZ: N=3, n $\geq$ 9 measurements acquired /group. \* p<0.05, ++ p<0.01, ++++ p<0.0001, One-way ANOVA and Tukey's post-hoc test. The white arrows point to A $\beta$  in astrocytes colocalizing with active caspase-3. The magnified images confirm A $\beta$  (red) content within astrocytes (GFAP) (overlap, magenta), and astrocytic caspase-3 activation (green) (overlap, cyan). A $\beta$  colocalizing with caspase-3, yellow. The graphs below represent the percentage of A $\beta$  and active caspase-3 signals overlapping with GFAP, indicating that both ATZ and MTZ significantly reduce astrocytic A $\beta$  accumulation and caspase-3 activation in astrocytes, in CA1. For A $\beta$ /GFAP overlap, TgSwDI and MTZ: N=5, ATZ: N=3, n $\geq$ 9 measurements acquired/group. \*\*p<0.01 and \*\*\*\* p<0.0001, One-way ANOVA and Tukey's post-hoc test. For active caspase-3/GFAP overlap, WT, TgSwDI and MTZ N=5, ATZ N=3, n $\geq$ 9 measurements acquired/group. + p<0.05, \*\*p<0.01, \*\*\*\* and ++++ p<0.0001, One-way ANOVA and Tukey's post-hoc test. **B)** Immunofluorescence images represent astrogliosis in the hypothalamus of 16-month-old mice. TgSwDI brains are characterized by increased GFAP+ cell area ( $\mu$ m<sup>2</sup>) (GFAP, magenta), in contrast to age-matched WT, and CAIs attenuate this phenotype. Nuclei stained with DAPI (blue). Original magnification, 60x. Scale bar, 25 $\mu$ m. On the right, the relative quantification, WT, TgSwDI and MTZ: N=5, ATZ: N=4. \*\* p<0.01, +++ p<0.001, \*\*\*\*p<0.0001, One-way ANOVA and Tukey's post-hoc test. Data are expressed as mean  $\pm$  SEM.
