# Supplementary material
Source: PubMed Central journal article supplement (PMC10600328)
Supplement: NIHMS1885209-supplement-fS5.pdf [file NIHMS1885209-supplement-fS5.pdf]

**A**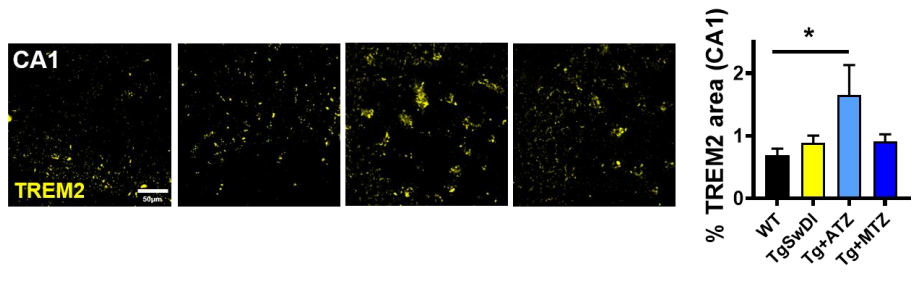**B**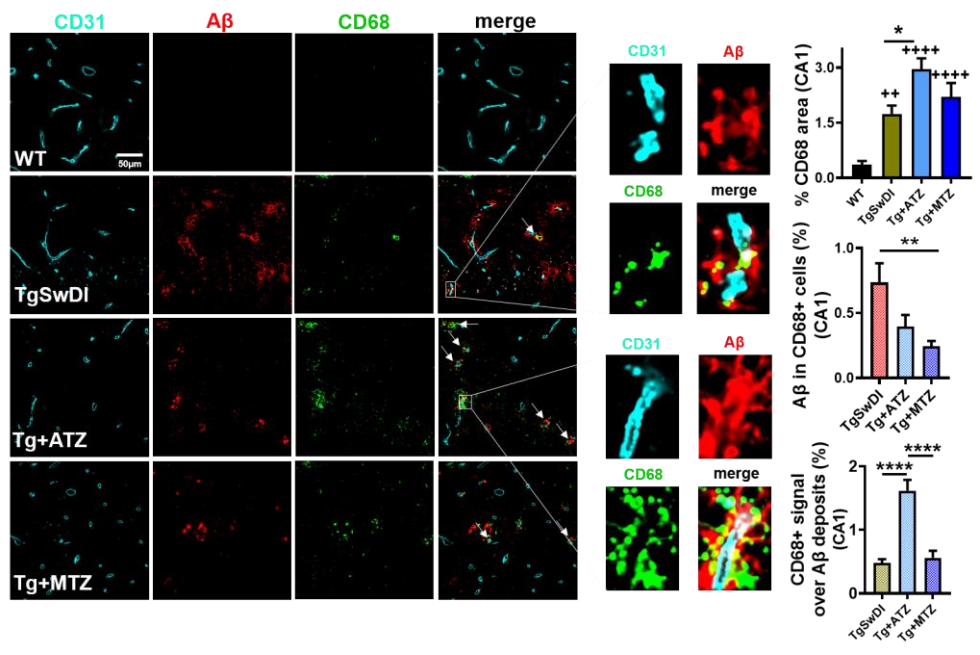

**Supplementary Figure 5: CAIs improve microglial and perivascular macrophage phagocytic activity in CA1 in TgSwDI mice.** **A)** Representative IHC images showing that ATZ increases TREM2 expression in microglia in the CA1 hippocampal area. Original magnification, 60x. Scale bar, 50 $\mu$ m. The relative quantification of %TREM2 area is on the right: WT, TgSwDI and MTZ: N=5, ATZ: N=3,  $n \geq 9$  measurements acquired/group. \*  $p < 0.05$ , One-way ANOVA and Tukey's post-hoc test. **B)** In CA1 area, CD68 expression (phagocytic activity marker, green) is higher in TgSwDI compared to WT. CAI-treatment boosts CD68 expression, mainly along the cerebral vasculature (stained with CD31, cyan). CD68 is colocalized with perivascular A $\beta$  (red). Original magnification, 60x. Scale bar, 50 $\mu$ m. The plot on the top right shows that CAI-treatment increases perivascular phagocytic activity, measured as %CD68 area per acquisition field. TgSwDI: N=7, WT: N=6, ATZ: N=4, MTZ: N=5,  $n \geq 12$  measurements acquired/group. \*  $p < 0.05$ , ++  $p < 0.01$ , ++++  $p < 0.0001$ , One-way ANOVA and Tukey's post-hoc test. The white arrows indicate A $\beta$  surrounding the microvasculature colocalized with CD68+ perivascular macrophages (PVM), as shown in yellow in the merged magnified images. On the right, colocalization plots for both A $\beta$  within CD68+ cells (A $\beta$ /CD68) and CD68+ cells over A $\beta$  deposits (CD68/A $\beta$ ). TgSwDI: N=7, MTZ: N=5, ATZ: N=4,  $n \geq 11$  measurements acquired/group. For A $\beta$ /CD68 colocalization, \*\*  $p < 0.01$ . For CD68/A $\beta$  colocalization, \*\*\*\*  $p < 0.0001$ , One-way ANOVA and Tukey's post-hoc test. Data are expressed as mean  $\pm$  SEM.
