# Supplementary material
Source: PubMed Central journal article supplement (PMC10600328)
Supplement: NIHMS1885209-supplement-fS6.pdf [file NIHMS1885209-supplement-fS6.pdf]

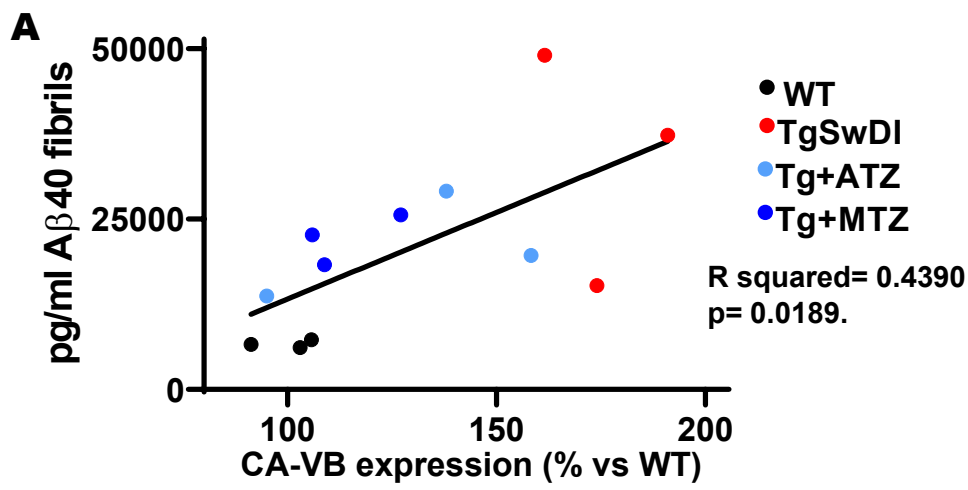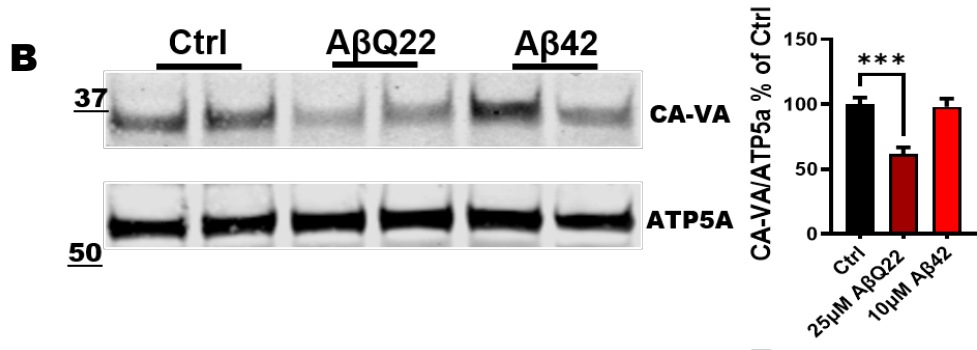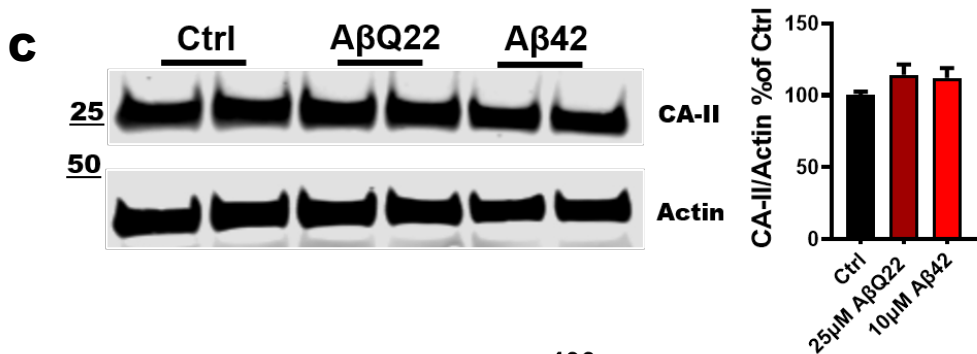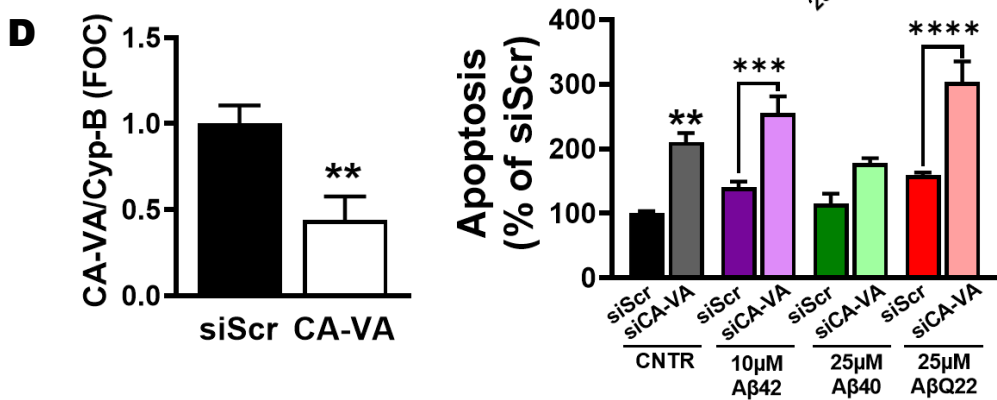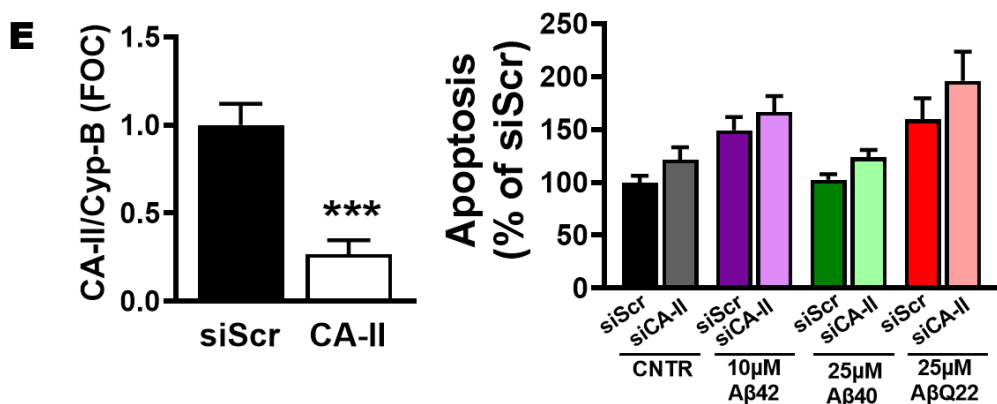

**Supplementary Figure 6: Correlation of cerebral CA-VB expression and A $\beta$  overload, and impact of CA-VA and CA-II downregulation on apoptosis.** **A)** Positive correlation between brain CA-VB expression and cerebral A $\beta$ 40 fibril overload. N=3/group. R squared=0.4390, p=0.0189. **B, C)** Expression of CA-VA (**B**) and CA-II (**C**) in hCMEC/D3 cells. Western Blot analysis of CA-VA and CA-II after 24hrs of treatment with A $\beta$ 40-Q22 (25 $\mu$ M) and A $\beta$ 42 (10 $\mu$ M). CA-VA was normalized to mitochondrial protein ATP5a, while cytosolic CA-II was normalized to actin. Quantification on the right. The expression of CA-VA is significantly reduced following 24hr A $\beta$ 40-Q22 treatment. Data represents the combination of at least three experiments, each with 2 replicates, graphed as mean + SEM. Ctrl vs. Q22 \*\*\*p<0.001. **D)** qRT-PCR for the mRNA expression levels of CA-VA and Cyp-B (control) at 48hrs post-transfection with siRNA for CA-VA (siCA-VA) or with a scrambled sequence (siScr). On the right, the impact of CA-VA downregulation on apoptosis, as measured by the formation of fragmented nucleosomes, after A $\beta$ 42 (10 $\mu$ M), A $\beta$ 40 (25 $\mu$ M) or A $\beta$ Q22 (25 $\mu$ M) challenge for 24hrs. \*\*p<0.01, \*\*\*p<0.001, \*\*\*\*p<0.0001 vs. siScr control, One-way ANOVA and Tukey's post-hoc test. **E)** qRT-PCR for the mRNA expression levels of CA-II and Cyp-B (control) at 48hrs post-transfection with siRNA for CA-II (siCA-II) or with a scrambled sequence (siScr). \*\*\*P<0.001 vs siScr, Unpaired two-tailed t-test. On the right, the effects of CA-II downregulation in apoptosis, as measured by the formation of fragmented nucleosomes, after A $\beta$ 42 (10 $\mu$ M), A $\beta$ 40 (25 $\mu$ M) or Q22 (25 $\mu$ M) challenge for 24hrs. In **D** and **E**, graphs display one representative experiment of at least N=3 experiments, each one performed in duplicate (n=2). Data are expressed as mean  $\pm$  SEM.
